# Supplementary material for: Hyphenation of high performance liquid chromatography with sector field inductively coupled plasma mass spectrometry for the determination of ultra-trace level anionic and cationic arsenic compounds in freshwater fishElectronic Supplementary Information (ESI) available: analytical figures of merit obtained with a standard set-up, the LOD for the high resolution mode, LODs reported by other authors and tissue concentrations for the Northern pike. See http://www.rsc.org/suppdata/ja/b3/b304890j/
Source: Royal Society of Chemistry journal article supplement (doi:10.1039/b304890j), 2004-01-01
Supplement: figs_tables.doc [file figs_tables.doc]

**Table S1:** Analytical figures of merit of HPLC-ICP-SFMS operated under low resolution (m/∆m = 300) using a conventional concentric nebulizer

|  | LOD (pg mL-1) | | LOD (pg) | | Repeatability (%) | | Range (ng ml-1) | R2 | |
| --- | --- | --- | --- | --- | --- | --- | --- | --- | --- |
| Analyte | Aa | Hb | A | H | A | H |  | A | H |
| As(III) | 3.9 | 4.8 | 0.39 | 0.48 | 0.5 | 2.1 | 0.1-20 | 0.99989 | 0.99994 |
| DMA | 4.4 | 8.2 | 0.44 | 0.82 | 1.0 | 1.6 | 0.1-20 | 0.99998 | 0.99991 |
| MMA | 5.8 | 4.0 | 0.58 | 0.40 | 1.0 | 2.4 | 0.1-20 | 0.99999 | 0.99995 |
| As(V) | 4.0 | 8.6 | 0.40 | 0.86 | 1.2 | 2.4 | 0.1-20 | 0.99999 | 1.00000 |
| AB | 2.5 | 1.9 | 0.25 | 0.19 | 2.0 | 2.1 | 0.1-20 | 0.99972 | 0.99998 |
| TMAO | 3.2 | 4.5 | 0.32 | 0.45 | 2.3 | 1.6 | 0.1-20 | 0.99926 | 0.99990 |
| AC | 2.7 | 3.3 | 0.27 | 0.33 | 1.1 | 2.8 | 0.1-20 | 0.99940 | 0.99985 |
| Tetra | 2.8 | 2.9 | 0.28 | 0.28 | 1.8 | 2.9 | 0.1-20 | 0.99957 | 0.99992 |

apeak area; bpeak height.

Detection limits were determined by making 6 repetitive injections (100 µl) of standards in the lower linear concentration range (0.1 ng/mL each) and were calculated from the standard deviations of the peak areas and peak heights (3), respectively. Repeatability was determined from peak areas and peak heights by calculating the relative standard deviation (RSD) of four successive analysis of a standard solution containing 0.5 ng/mL each analyte.

**Table S2:** Analytical figures of merit of HPLC-ICP-SFMS operated under high resolution (m/∆m = 10,000) using a conventional concentric nebulizer

|  | LOD (pg mL-1) | | LOD (pg) | | Repeatability (%) | | Range (ng ml-1) | R2 | |
| --- | --- | --- | --- | --- | --- | --- | --- | --- | --- |
| Analyte | Aa | Hb | A | H | A | H |  | A | H |
| As(III) | 130 | 280 | 13 | 28 | 8.5 | 17.4 | 0.5-20 | 0.99974 | 0.99997 |
| DMA | 190 | 290 | 19 | 29 | 12.9 | 17.4 | 0.5-20 | 0.99995 | 0.99904 |
| MMA | 220 | 240 | 22 | 24 | 15.8 | 14.2 | 0.5-20 | 0.99998 | 0.99979 |
| As(V) | 150 | 260 | 15 | 26 | 10.4 | 15.1 | 0.5-20 | 0.99890 | 0.99894 |
| AB | 200 | 180 | 20 | 18 | 14.1 | 12.3 | 0.5-20 | 0.99840 | 0.99640 |
| TMAO | 190 | 210 | 19 | 21 | 12.9 | 15.5 | 0.5-20 | 0.99939 | 0.99784 |
| AC | 170 | 130 | 17 | 13 | 11.6 | 9.5 | 0.5-20 | 0.99975 | 0.99966 |
| Tetra | 110 | 150 | 11 | 15 | 7.1 | 11.0 | 0.5-20 | 0.99990 | 0.99976 |

*Detection limits were determined by making 6 repetitive injections (100 µl) of standards in the lower linear concentration range (0.5 ng/mL each) and were calculated from the standard deviations of the peak areas and peak heights (3), respectively. Repeatability was determined from peak areas and peak heights by calculating the relative standard deviation (RSD) of four successive analysis of a standard solution containing 0.5 ng/mL each analyte. apeak area; bpeak height.

**Table S3**: Comparison of chromatographic peak resolution (R) between using concentric nebulizer and Aridus system.

|  | RDMA-AB | RAB-TMAO | RTMAO-AC | RAC-Tetra |
| --- | --- | --- | --- | --- |
| Concentric nebulizer | 0.98 | 1.49 | 1.63 | 1.33 |
| Aridus | 0.63 | 0.86 | 0.94 | 0.65 |

**Table** **S4:** Comparison of LODs (ng/mL as As) obtained with different techniques for As speciation analysis reported in recent literatures

| Technique | As(III) | DMA | MMA | As(V) | AB | TMAO | AC | Tetra | Ref. |
| --- | --- | --- | --- | --- | --- | --- | --- | --- | --- |
| HPLC-HG-AFS | 0.5 | 0.7 | 0.4 | 0.8 | --- | --- | --- | --- | Le and Ma 7 |
| HPLC-MIP-MS | --- | 1.85 | 1.67 | 2.25 | 3.07 | 13.3 | 2.63 | 2.77 | Chatterjee et al.8 |
| HPLC-USN-MIP-MS | --- | 0.73 | 0.36 | 0.46 | 0.21 | 3.64 | 0.39 | 0.32 | Chatterjee et al.8 |
| HPLC-Q-ICPMS | 0.089  0.067  0.37  0.19  0.02 | 0.25  0.074  0.32  0.16  0.08 | 0.20  0.035  ---  0.29  0.08 | 0.34  0.089  0.42  0.52  0.08 | 0.067  ---  0.33  0.16  1.0 | 0.14  ---  ---  0.60  0.08 | 0.19  ---  0.38  0.58  0.08 | 0.28  ---  ---  0.38  0.08 | Nakazato et al.9  Day et al.10  Mattusch et al.11  Londesborough et al.12  Kohlmeyer et al13 |
| HPLC-HHPN-Q-ICPMS | 0.20 | 0.12 | 0.06 | 0.60 | 0.09 | --- | 0.04 | --- | Zheng et al.14 |
| HPLC-HG-Q-ICPMS | 0.022 | 0.028 | 0.016 | 0.048 | --- | 0.075 | --- | --- | Nakazato et al.9 |
| HPLC-HEX-ICPMS | 0.06 | 0.1 | 0.4 | 0.05 | 0.02 | --- | --- | --- | Xie et al.15 |
| HPLC-SF-ICPMS (m/∆m = 300) | 0.090 | 0.054 | 0.076 | 0.072 | 0.049 | --- | --- | --- | Koellensperger et al.5 |
| HPLC-SF-ICPMS LR  HR  LR (MicroMist) | 0.0039  0.13  0.0015 | 0.0044  0.19  0.0021 | 0.0058  0.22  0.0024 | 0.0040  0.15  0.0022 | 0.0025  0.20  0.0012 | 0.0032  0.19  0.0013 | 0.0027  0.17  0.0016 | 0.0028  0.11  0.0016 | This work |

**Figure captions**

**Figure S1**. Chromatogram of separated cationic As compounds (0.2 ng/mL) with HPLC-ICP-SFMS at low resolution mode (m/ = 300) using the Aridus system as an interface.

**Figure S2**. Chromatograms of As standard solutions (0.05 ng/mL) obtained with HPLC-ICP-MS at low resolution mode (m/ = 300) using the MicroMist nebulizer. A: anion-exchange chromatography; B: cation-exchange chromatography.

**Figure S3**. The distribution of As compounds in different tissues of Northern Pike, *Esox lucius (Linnaeus)*.

Figure S1

As(III)

DMA

MMA

As(V)

Figure 2

Figure S3
